# Supplementary material for: Interrogating process deficiencies in large-scale hydrologic models with interpretable machine learning
Source: Copernicus journal article supplement (doi:10.5194/hess-29-4457-2025), 2025-09-17
Supplement: Supplementary file 1 [file hess-29-4457-2025-supplement.pdf]

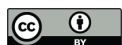

*Supplement of*

## **Interrogating process deficiencies in large-scale hydrologic models with interpretable machine learning**

**Admin Husic et al.**

*Correspondence to:* Admin Husic ([husic@vt.edu](mailto:husic@vt.edu))

The copyright of individual parts of the supplement might differ from the article licence.

**Section S1:** An overview of the National Water Model (NWM) maintained by the Office of Water Prediction of NOAA and the National Hydrological Model (NHM) maintained by the U.S. Geological Survey. These two national-scale models, while both aiming to simulate hydrological processes across the continental U.S. (CONUS), differ significantly in their underlying modeling frameworks, primary operational objectives, spatial discretization, input datasets, and the specific hydrological processes they explicitly represent. Please see Towler et al. (2023) for additional details on each model.

## **National Water Model (NWM) Version 2.1**

The National Center for Atmospheric Research (NCAR) developed WRF-Hydro, an open-source hydrologic model that serves as the foundation for the National Oceanic and Atmospheric Administration's (NOAA) National Water Model (NWM). NWM simulates and forecasts key water components (e.g., evapotranspiration, snow, soil moisture, streamflow) in real-time across the continental U.S., Hawaii, Puerto Rico, and the U.S. Virgin Islands. NWM version 2.1 utilizes 1 km atmospheric data from NOAA's Analysis of Record for Calibration (AORC) and employs the Noah-MP land surface model to compute energy and water states on a 1 km grid. Hydrologic routing occurs on a 250 m resolution terrain grid, utilizing WRF-Hydro's baseflow parameterization and the Muskingum–Cunge river routing scheme on an adapted NHDPlus version-2 river network. The model features a level-pool scheme for 5,783 lakes and reservoirs, although it lacks active reservoir management. While operational data assimilation is included, it is not applied in the retrospective simulations. Calibration of 14 parameters occurred from water years 2008 to 2013, validated against data from 2014 to 2016 across 1,378 gaged basins.

## **National Hydrological Model (NHM) Version 1.0**

The U.S. Geological Survey (USGS) developed the National Hydrologic Model (NHM, version 1.0) based on the Precipitation–Runoff Modeling System (PRMS), a modular system often employed for water resource assessment and scenario analysis. NHM simulates water flow and storage processes, including snowpack, soil, and stream networks, using daily discharge simulations. The NHMv1.0 results used here come from a calibration workflow focused on observed streamflow and the Muskingum–Mann routing option. Climate inputs consist of 1 km resolution daily precipitation and temperature data from Daymet. The model's spatial structure is defined by geospatial fabric version 1.0, which for PRMS typically delineates Hydrologic Response Units (HRUs). Calibration employs a stepwise approach to optimize parameters for water budgets and streamflow, first aligning hydrologic responses to baseline observations and then timing streamflow against data from 7,265 headwater watersheds. Final calibration occurs at 1,417 stream gage locations. The calibration period spans odd water years from 1981 to 2010, with validation using even years. NHM does not simulate reservoir operations or water withdrawals; it outputs daily streamflow for analysis.

**Table S1.** Predictor types, variable names, and BasinATLAS reference names (Linke et al., 2019).

| Variable Name (and type) |                        | BasinATLAS Name |
|--------------------------|------------------------|-----------------|
| Climate                  | Precipitation          | pre_mm_syr      |
|                          | Potential ET.          | pet_mm_syr      |
|                          | Actual ET.             | aet_mm_syr      |
|                          | Aridity Index          | ari_ix_sav      |
|                          | Air Temp. Min.         | tmp_dc_smn      |
|                          | Air Temp. Max.         | tmp_dc_smx      |
|                          | Air Temp. Avg.         | tmp_dc_syr      |
|                          | Snow Cover Max.        | snw_pc_smx      |
|                          | Snow Cover Avg.        | snw_pc_syr      |
|                          | Permafrost Extent      | prm_pc_sse      |
|                          | Glacier Extent         | gla_pc_sse      |
| Hydrology                | Natural Discharge Min. | dis_m3_pmn      |
|                          | Natural Discharge Max. | dis_m3_pmx      |
|                          | Natural Discharge Avg. | dis_m3_pyr      |
|                          | Naturalized Runoff     | run_mm_syr      |
|                          | River Area             | ria_ha_usu      |
|                          | River Volume           | riv_tc_usu      |
|                          | Inundation Extent Min. | inu_pc_smn      |
|                          | Inundation Extent Max. | inu_pc_smx      |
|                          | Lake Area Percent      | lka_pc_sse      |
|                          | Lake Volume            | lkv_mc_usu      |
|                          | Reservoir Volume       | rev_mc_usu      |
|                          | Regulation by Dams     | dor_pc_pva      |
| Topography               | Basin Area             | area            |
|                          | Elevation Avg.         | ele_mt_sav      |
|                          | Elevation Min.         | ele_mt_smn      |
|                          | Elevation Max.         | ele_mt_smx      |
|                          | Stream Gradient        | sgr_dk_sav      |
|                          | Basin Slope            | slp_dg_sav      |
| Soils & Geology          | Clay Fraction          | cly_pc_sav      |
|                          | Silt Fraction          | slt_pc_sav      |
|                          | Sand Fraction          | snd_pc_sav      |
|                          | Soil Water Content     | swc_pc_syr      |
|                          | Soil Organic Carbon    | soc_th_sav      |
|                          | Groundwater Depth      | gwt_cm_sav      |
|                          | Karst Cover            | kar_pc_sse      |
| Natural                  | Forest Cover           | for_pc_sse      |
|                          | Wetlands               | wet_pc_sg2      |
|                          | Protected Area         | pac_pc_sse      |
| Agriculture              | Cropland               | crp_pc_sse      |
|                          | Irrigated Area         | ire_pc_sse      |
|                          | Pasture                | pst_pc_sse      |
|                          | Soil Erosion           | ero_kh_sav      |
| Urban                    | Urban Extent           | urb_pc_sse      |
|                          | Road Density           | rdd_mk_sav      |
|                          | Population Count       | pop_ct_usu      |
|                          | Population Density     | ppd_pk_sav      |
|                          | Human Footprint        | hft_ix_s09      |

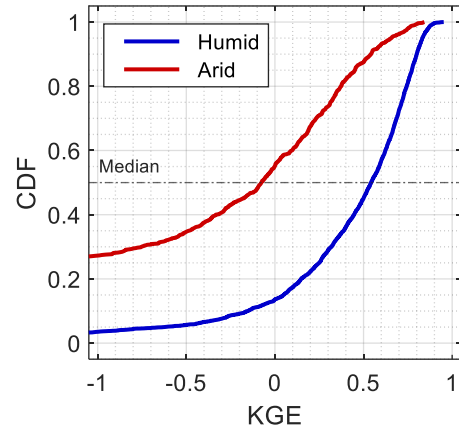

**Figure S1.** Cumulative distribution function (CDF) of National Hydrologic Model performance for humid (PET/P < 1, n = 3,827) and arid (PET/P > 1, n = 787) sites as assessed by the Kling–Gupta efficiency (KGE) evaluation metric.



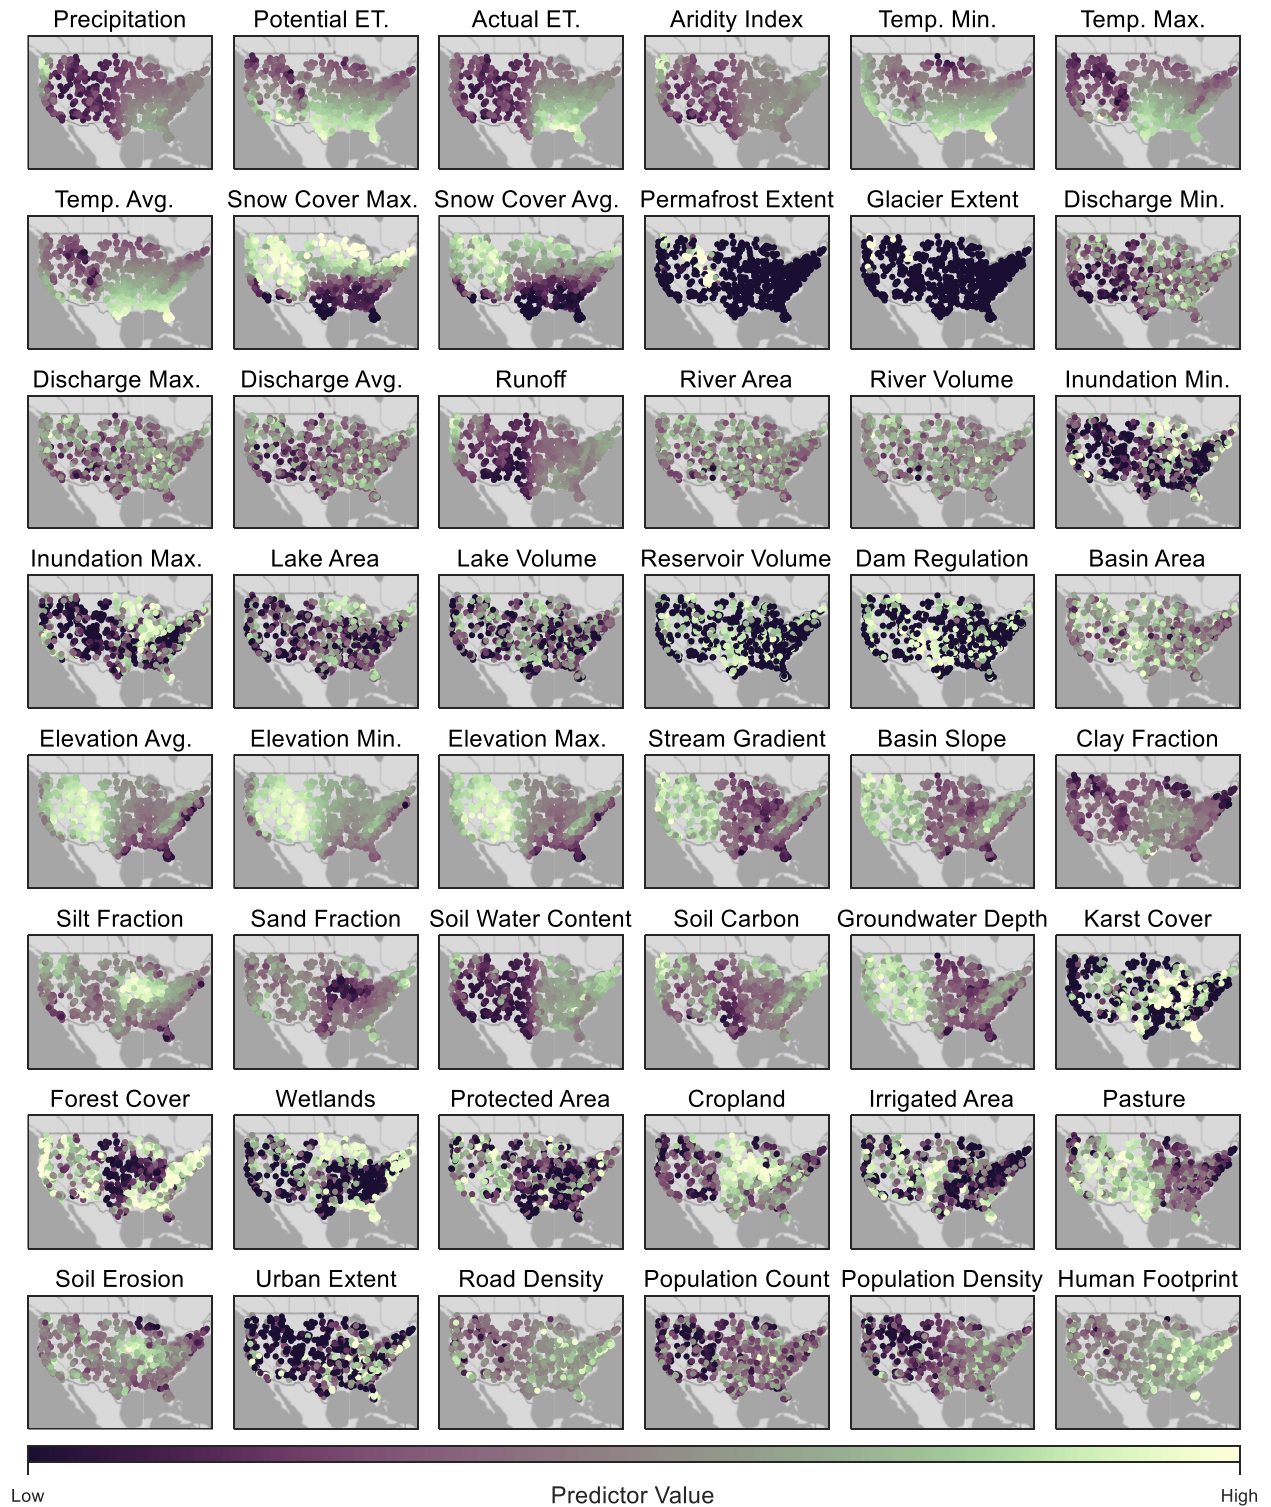

**Figure S2.** Catchment attributes plotted for the study basins. For a full description of variables see Table S1. The color scale for each predictor is based on a Box-Cox transformation of the data to highlight spatial gradients, not absolute values of features.

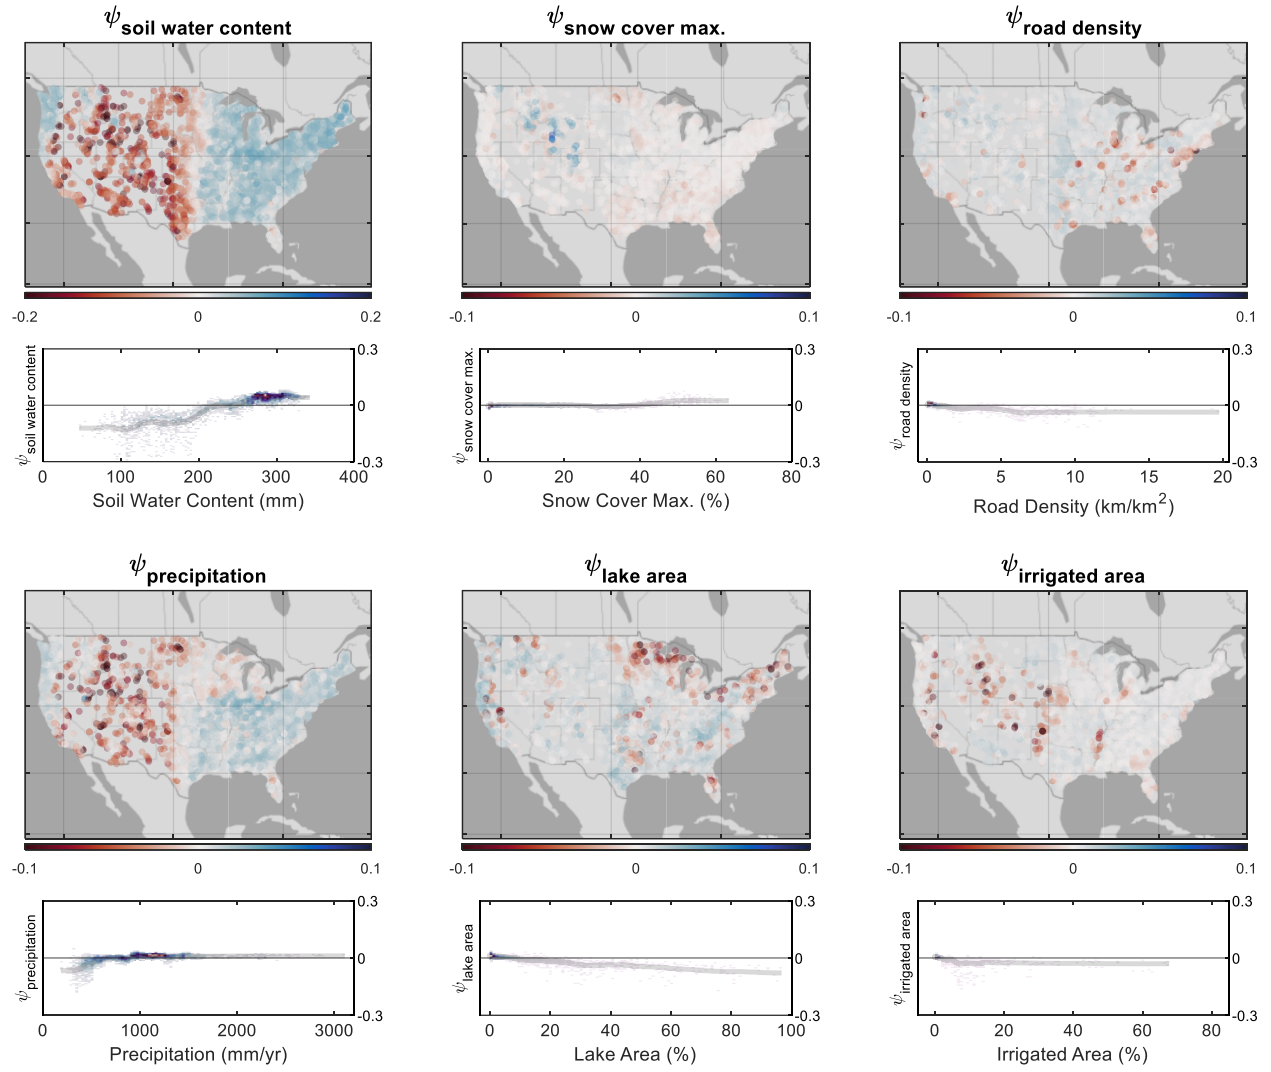

**Figure S3.** Spatial distribution of Shapley values ( $\psi$ ) for selected influential features and their impact on Kling–Gupta efficiency (KGE) prediction for the National Hydrologic Model (NHM). The colorbar represents the magnitude of  $\psi$ . The partial dependence plot of each feature is shown. Features value distributions are represented with a heatmap. A moving average of feature values is indicated by a line to show general trends.

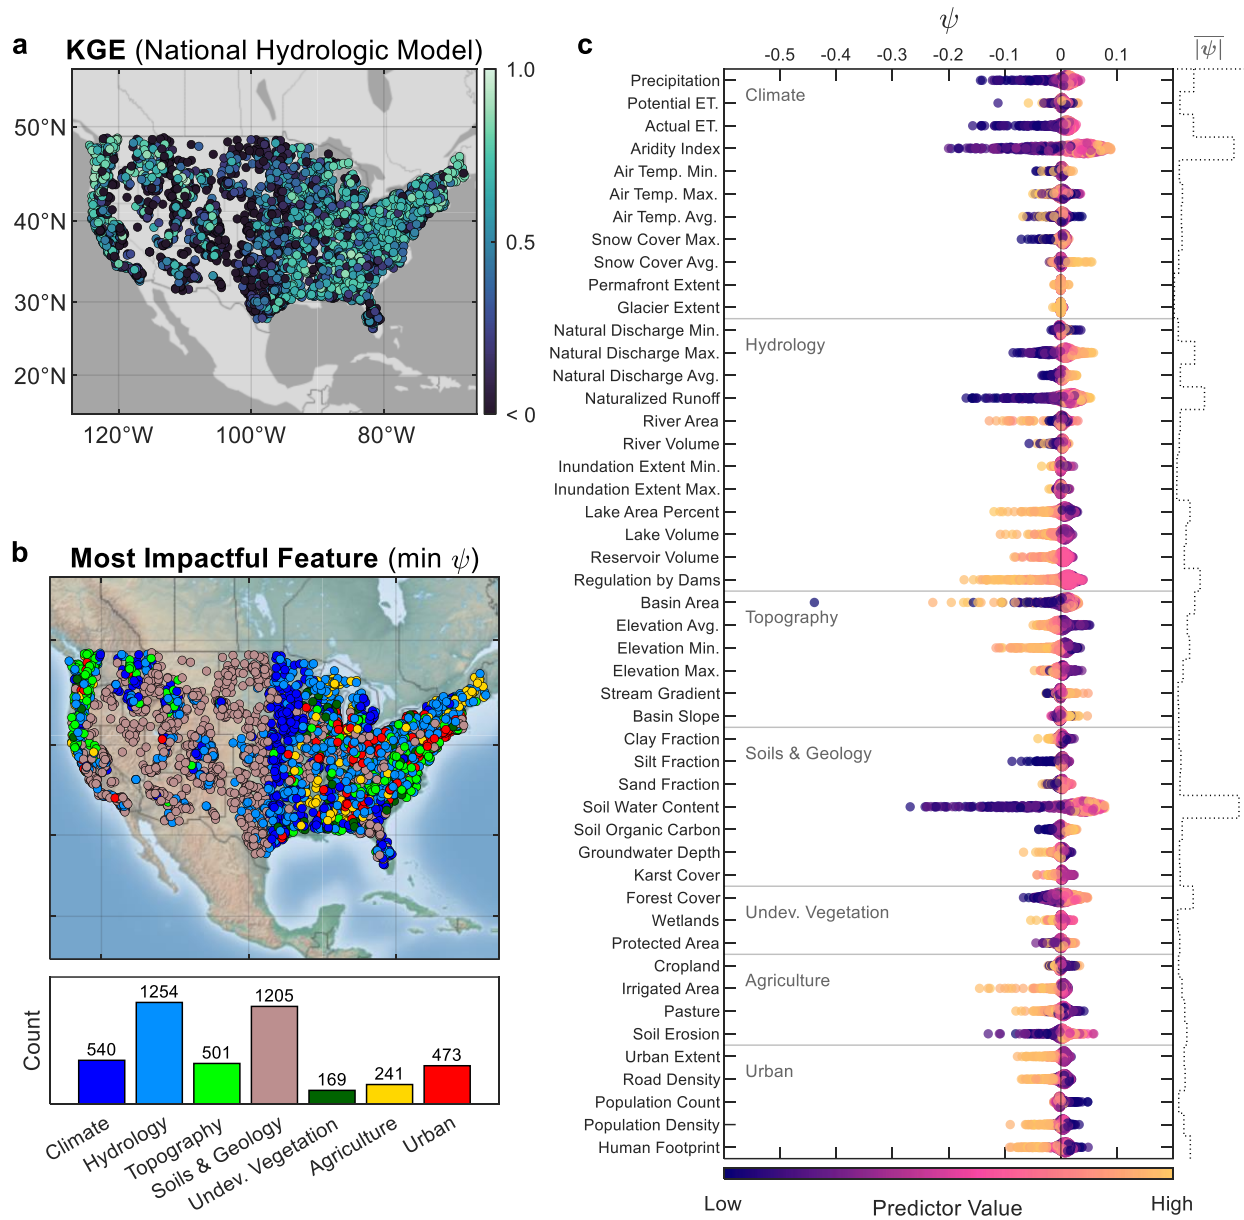

**Figure S4.** (a) Map of Kling–Gupta efficiency (KGE) for the National Hydrologic Model (NHM). (b) Map and histogram of the most impactful feature causing poor model performance at each site, i.e., the predictor group having the greatest negative Shapley value ( $\psi$ ) at a site. (c) Swarm chart of Shapley values for KGE prediction showing feature importance for 48 predictors. The staircase plot on the right axis indicates the mean absolute Shapley value ( $|\psi|$ ) of all observations for a predictor.

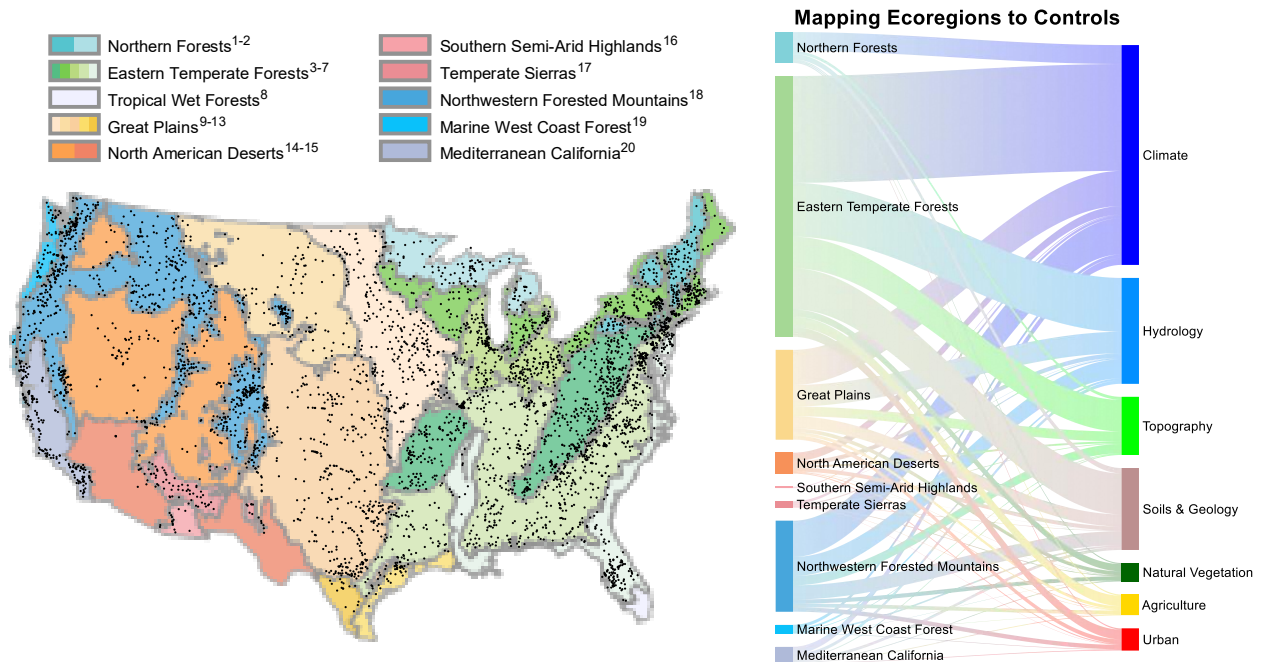

**Figure S5.** Map of study stream gages (black markers) and the Ecological Regions of North America (as defined in Omernik, 1987). Sankey diagram showing the pairing of ecoregions and impactful feature classes for the National Hydrologic Model (NHM) for the Kling–Gupta efficiency (KGE) evaluation metric. Superscripts in ecoregion classifications are defined in Section 2.3.

## References

Towler, E., Foks, S. S., Dugger, A. L., Dickinson, J. E., Essaid, H. I., Gochis, D., Viger, R. J., and Zhang, Y.: Benchmarking high-resolution hydrologic model performance of long-term retrospective streamflow simulations in the contiguous United States, *Hydrol. Earth Syst. Sci.*, 27, 1809–1825, <https://doi.org/10.5194/hess-27-1809-2023>, 2023.
